# Supplementary material for: Genetic and Evolutionary Analysis of Porcine Deltacoronavirus in Guangxi Province, Southern China, from 2020 to 2023
Source: MDPI journal article supplement (doi:10.3390/microorganisms12020416), 2024-02-19
Supplement: s1 [file s1]

## Supplementary

**Supplementary Table S1.** The information of S gene of PDCoV strains used in this study.

| Virus strain        | Date | Origin           | Accession No. | Virus strain      | Date | Origin | Accession No. |
|---------------------|------|------------------|---------------|-------------------|------|--------|---------------|
| CHAH-KP757890-2004  | 2004 | Anhui, CHN       | KP757890      | USA-KR265847-2014 | 2014 | USA    | KR265847      |
| CHHK-NC039208-2010  | 2010 | Hong Kong, CHN   | NC039208      | USA-KR265848-2014 | 2014 | USA    | KR265848      |
| CHHK-JQ065043-2010  | 2010 | Hong Kong, CHN   | JQ065043      | USA-KR265849-2014 | 2014 | USA    | KR265849      |
| CHHK-JQ065042-2009  | 2009 | Hong Kong, CHN   | JQ065042      | USA-KR265850-2014 | 2014 | USA    | KR265850      |
| CHSD-MF431743-2014  | 2014 | Shandong, CHN    | MF431743      | USA-KR265851-2014 | 2014 | USA    | KR265851      |
| CHHN-KT336560-2014  | 2014 | Henan, CHN       | KT336560      | USA-KR265852-2014 | 2014 | USA    | KR265852      |
| CHHuN-KY513724-2014 | 2014 | Hunan, CHN       | KY513724      | USA-KR265853-2014 | 2014 | USA    | KR265853      |
| CHHuB-KP757891-2014 | 2014 | Hubei, CHN       | KP757891      | USA-KR265854-2014 | 2014 | USA    | KR265854      |
| CHJS-KP757892-2014  | 2014 | Jiangsu, CHN     | KP757892      | USA-KR584357-2014 | 2014 | USA    | KR584357      |
| CHJS-KU665558-2014  | 2014 | Jiangsu, CHN     | KU665558      | USA-KR584358-2014 | 2014 | USA    | KR584358      |
| CHHeN-MN942260-2015 | 2015 | Henan, CHN       | MN942260      | USA-KR584359-2014 | 2014 | USA    | KR584359      |
| CHJX-KR131621-2015  | 2015 | Jiangxi, CHN     | KR131621      | USA-KR584360-2014 | 2014 | USA    | KR584360      |
| CHGD-MF431742-2015  | 2015 | Guangdong, CHN   | MF431742      | USA-KR584361-2014 | 2014 | USA    | KR584361      |
| CHSXD-KT021234-2015 | 2015 | Shaanxi, CHN     | KT021234      | USA-KR584362-2014 | 2014 | USA    | KR584362      |
| CHTW-MW853634-2015  | 2015 | Taiwan, CHN      | MW853634      | USA-KR584363-2014 | 2014 | USA    | KR584363      |
| CHGX-KU204697-2015  | 2015 | Guangxi, GX, CHN | KU204697      | USA-KR584364-2014 | 2014 | USA    | KR584364      |
| CHHN-KX443143-2016  | 2016 | Henan, CHN       | KX443143      | USA-KR584365-2014 | 2014 | USA    | KR584365      |
| CHHN-MG832584-2016  | 2016 | Henan, CHN       | MG832584      | USA-KJ584355-2014 | 2014 | USA    | KJ584355      |
| CHGS-MF642322-2016  | 2016 | Gansu, CHN       | MF642322      | USA-KJ584356-2014 | 2014 | USA    | KJ584356      |
| CHGS-MF642323-2016  | 2016 | Gansu, CHN       | MF642323      | USA-KJ584357-2014 | 2014 | USA    | KJ584357      |
| CHGS-MF642324-2016  | 2016 | Gansu, CHN       | MF642324      | USA-KJ584358-2014 | 2014 | USA    | KJ584358      |
| CHGS-MF642325-2016  | 2016 | Gansu, CHN       | MF642325      | USA-KJ584359-2014 | 2014 | USA    | KJ584359      |

|                     |      |                |          |                   |      |       |          |
|---------------------|------|----------------|----------|-------------------|------|-------|----------|
| CHSC-MK355396-2016  | 2016 | Sichuan, CHN   | MK355396 | USA-KJ620016-2014 | 2014 | USA   | KJ620016 |
| CHJX-KY293677-2016  | 2016 | Jianxi, CHN    | KY293677 | USA-MZ291567-2014 | 2014 | USA   | MZ291567 |
| CHJX-KY293678-2016  | 2016 | Jianxi, CHN    | KY293678 | USA-KJ362462-2014 | 2014 | USA   | KJ362462 |
| CHGD-MH715491-2016  | 2016 | Guangdong, CHN | MH715491 | USA-KM012168-2014 | 2014 | USA   | KM012168 |
| CHGD-KY363868-2016  | 2016 | Guangdong, CHN | KY363868 | USA-KJ569769-2014 | 2014 | USA   | KJ569769 |
| CHTJ-KY065120-2016  | 2016 | Tianjin, CHN   | KY065120 | USA-KJ584352-2014 | 2014 | USA   | KJ584352 |
| CHSH-MF041982-2016  | 2016 | Shanghai, CHN  | MF041982 | USA-KJ481931-2014 | 2014 | USA   | KJ481931 |
| CHGX-MZ388469-2016  | 2016 | Guangxi, CHN   | MZ388469 | USA-KJ601779-2014 | 2014 | USA   | KJ601779 |
| CHHB-MF948005-2017  | 2017 | Hebei, CHN     | MF948005 | USA-KJ567050-2014 | 2014 | USA   | KJ567050 |
| CHHB-MF037204-2017  | 2017 | Hebei, CHN     | MF037204 | USA-KT381613-2014 | 2014 | USA   | KT381613 |
| CHHeB-MG242062-2017 | 2017 | Hebei, CHN     | MG242062 | USA-KX022602-2015 | 2015 | USA   | KX022602 |
| CHSC-MK330604-2017  | 2017 | Sichuan, CHN   | MK330604 | USA-KX022603-2015 | 2015 | USA   | KX022603 |
| CHSC-MK572803-2017  | 2017 | Sichuan, CHN   | MK572803 | USA-KX022604-2015 | 2015 | USA   | KX022604 |
| CHSC-MK211169-2017  | 2017 | Sichuan, CHN   | MK211169 | USA-KX022605-2015 | 2015 | USA   | KX022605 |
| CHHG-MF095123-2017  | 2017 | Hubei, CHN     | MF095123 | USA-KR150443-2015 | 2015 | USA   | KR150443 |
| CHJS-MN249445-2017  | 2017 | Jiangsu, CHN   | MN249445 | JPN-LC260038-2014 | 2014 | Japan | LC260038 |
| CHJS-MN249445-2017  | 2017 | Jiangsu, CHN   | MN249445 | JPN-LC260039-2014 | 2014 | Japan | LC260039 |
| CHHK-MT263013-2017  | 2017 | Hong Kong, CHN | MT263013 | JPN-LC260040-2014 | 2014 | Japan | LC260040 |
| CHGX-MZ388470-2017  | 2017 | Guangxi, CHN   | MZ388470 | JPN-LC260042-2014 | 2014 | Japan | LC260042 |
| CHGX-MZ388471-2017  | 2017 | Guangxi, CHN   | MZ388471 | JPN-LC260043-2014 | 2014 | Japan | LC260043 |
| CHGX-MZ388472-2017  | 2017 | Guangxi, CHN   | MZ388472 | JPN-LC260045-2014 | 2014 | Japan | LC260045 |
| CHGX-MT505445-2017  | 2017 | Guangxi, CHN   | MT505445 | KOR-KM820765-2014 | 2014 | Korea | KM820765 |
| CHGX-MT505446-2017  | 2017 | Guangxi, CHN   | MT505446 | KOR-MG837130-2016 | 2016 | Korea | MG837130 |
| CHGX-MT505447-2017  | 2017 | Guangxi, CHN   | MT505447 | KOR-MG837131-2016 | 2016 | Korea | MG837131 |
| CHGX-MT505448-2017  | 2017 | Guangxi, CHN   | MT505448 | KOR-MG837132-2016 | 2016 | Korea | MG837132 |
| CHGX-MT505449-2017  | 2017 | Guangxi, CHN   | MT505449 | KOR-MG837133-2016 | 2016 | Korea | MG837133 |
| CHGX-MK040449-2017  | 2017 | Guangxi, CHN   | MK040449 | KOR-KY354363-2016 | 2016 | Korea | KY354363 |

|                    |      |               |          |                        |      |                   |          |
|--------------------|------|---------------|----------|------------------------|------|-------------------|----------|
| CHGX-MK040450-2017 | 2017 | Guangxi, CHN  | MK040450 | KOR-KY354564-2016      | 2016 | Korea             | KY354564 |
| CHGX-MN025260-2017 | 2017 | Guangxi, CHN  | MN025260 | KOR-KY926512-2016      | 2016 | Korea             | KY926512 |
| CHJX-MK625638-2018 | 2018 | Jianxi, CHN   | MK625638 | Haiti-MW685623-2015    | 2015 | Haiti             | MW685623 |
| CHJX-MK625639-2018 | 2018 | Jianxi, CHN   | MK625639 | MEXICO-MK478383-2017   | 2017 | Mexico            | MK478383 |
| CHJX-MK625640-2018 | 2018 | Jianxi, CHN   | MK625640 | Peru-MT227371-2019     | 2019 | Peru              | MT227371 |
| CHJX-MK625641-2018 | 2018 | Jianxi, CHN   | MK625641 | Thailand-KX361343-2013 | 2013 | Thailand          | KX361343 |
| CHSC-MK330605-2018 | 2018 | Sichuan, CHN  | MK330605 | Thailand-KX361344-2013 | 2013 | Thailand          | KX361344 |
| CHSC-MK005882-2018 | 2018 | Sichuan, CHN  | MK005882 | Thailand-KX361345-2015 | 2015 | Thailand          | KX361345 |
| CHSD-MN173809-2018 | 2018 | Shandong, CHN | MN173809 | Thailand-KU051641-2015 | 2015 | Thailand          | KU051641 |
| CHSD-MN173810-2018 | 2018 | Shandong, CHN | MN173810 | Thailand-KU051649-2015 | 2015 | Thailand          | KU051649 |
| CHSD-MN173811-2018 | 2018 | Shandong, CHN | MN173811 | Thailand-MZ802772-2015 | 2015 | Thailand          | MZ802772 |
| CHSD-MN173812-2018 | 2018 | Shandong, CHN | MN173812 | Thailand-MZ802775-2015 | 2015 | Thailand          | MZ802775 |
| CHSD-MN173803-2018 | 2018 | Shandong, CHN | MN173803 | Thailand-KU984334-2015 | 2015 | Thailand          | KU984334 |
| CHSD-MN173805-2018 | 2018 | Shandong, CHN | MN173805 | Thailand-MZ802773-2016 | 2016 | Thailand          | MZ802773 |
| CHSD-MN173806-2018 | 2018 | Shandong, CHN | MN173806 | Thailand-MZ802774-2016 | 2016 | Thailand          | MZ802774 |
| CHSD-MN173807-2018 | 2018 | Shandong, CHN | MN173807 | Thailand-MZ802777-2016 | 2016 | Thailand          | MZ802777 |
| CHHN-MH708123-2018 | 2018 | Henan, CHN    | MH708123 | Vietnam-KX834351-2015  | 2015 | Vietnam           | KX834351 |
| CHHN-MH708124-2018 | 2018 | Henan, CHN    | MH708124 | Vietnam-KX834352-2015  | 2015 | Vietnam           | KX834352 |
| CHHN-MT260149-2018 | 2018 | Henan, CHN    | MT260149 | Vietnam-KX998969-2015  | 2015 | Vietnam           | KX998969 |
| CHGX-MZ388473-2018 | 2018 | Guangxi, CHN  | MZ388473 | Vietnam-MH118332-2015  | 2015 | Vietnam           | MH118332 |
| CHGX-MZ388474-2018 | 2018 | Guangxi, CHN  | MZ388474 | Vietnam-MZ802776-2016  | 2016 | Vietnam           | MZ802776 |
| CHGX-MK359104-2018 | 2018 | Guangxi, CHN  | MK359104 | CHGX-BS01-2020         | 2020 | Baise, GX, CHN    | OR659117 |
| CHGX-MN173782-2018 | 2018 | Guangxi, CHN  | MN173782 | CHGX-BS02-2020         | 2020 | Baise, GX, CHN    | OR659118 |
| CHGX-MN173779-2018 | 2018 | Guangxi, CHN  | MN173779 | CHGX-BS03-2020         | 2020 | Baise, GX, CHN    | OR659119 |
| CHGX-MN173780-2018 | 2018 | Guangxi, CHN  | MN173780 | CHGX-BS01-2021         | 2021 | Baise, GX, CHN    | OR659120 |
| CHGX-MN173781-2018 | 2018 | Guangxi, CHN  | MN173781 | CHGX-BS02-2021         | 2021 | Baise, GX, CHN    | OR659121 |
| CHGX-MT505450-2018 | 2018 | Guangxi, CHN  | MT505450 | CHGX-CZ01-2021         | 2021 | Chongzuo, GX, CHN | OR659136 |

|                     |      |                   |          |                |      |                   |          |
|---------------------|------|-------------------|----------|----------------|------|-------------------|----------|
| CHGX-MT505451-2018  | 2018 | Guangxi, CHN      | MT505451 | CHGX-CZ02-2021 | 2021 | Chongzuo, GX, CHN | OR659137 |
| CHGX-MT505452-2018  | 2018 | Guangxi, CHN      | MT505452 | CHGX-CZ03-2021 | 2021 | Chongzuo, GX, CHN | OR659138 |
| CHGX-MT505453-2018  | 2018 | Guangxi, CHN      | MT505453 | CHGX-CZ04-2021 | 2021 | Chongzuo, GX, CHN | OR659139 |
| CHGX-MT505454-2018  | 2018 | Guangxi, CHN      | MT505454 | CHGX-GG01-2022 | 2022 | Guigang, GX, CHN  | OR659140 |
| CHGX-MT505455-2018  | 2018 | Guangxi, CHN      | MT505455 | CHGX-GG02-2022 | 2022 | Guigang, GX, CHN  | OR659141 |
| CHGX-MN520203-2018  | 2018 | Guangxi, CHN      | MN520203 | CHGX-GG03-2022 | 2022 | Guigang, GX, CHN  | OR659142 |
| CHGX-MN058073-2018  | 2018 | Guangxi, CHN      | MN058073 | CHGX-GG04-2022 | 2022 | Guigang, GX, CHN  | OR659143 |
| CHAN-MN520198-2019  | 2019 | Anhui, CHN        | MN520198 | CHGX-GG05-2022 | 2022 | Guigang, GX, CHN  | OR659144 |
| CHTS-MT663769-2019  | 2019 | Hebei, CHN        | MT663769 | CHGX-GG06-2022 | 2022 | Guigang, GX, CHN  | OR659145 |
| CHSC-MK993519-2019  | 2019 | Sichuan, CHN      | MK993519 | CHGX-GG07-2022 | 2022 | Guigang, GX, CHN  | OR659146 |
| CHSD-MN520191-2019  | 2019 | Shandong, CHN     | MN520191 | CHGX-NN01-2021 | 2021 | Nanning, GX, CHN  | OR659147 |
| CHGX-MT505456-2019  | 2019 | Guangxi, CHN      | MT505456 | CHGX-NN02-2021 | 2021 | Nanning, GX, CHN  | OR659148 |
| CHGX-MT505457-2019  | 2019 | Guangxi, CHN      | MT505457 | CHGX-NN03-2021 | 2021 | Nanning, GX, CHN  | OR659149 |
| CHGX-MT505458-2019  | 2019 | Guangxi, CHN      | MT505458 | CHGX-BS01-2022 | 2022 | Baise, GX, CHN    | OR659122 |
| CHGX-MT505459-2019  | 2019 | Guangxi, CHN      | MT505459 | CHGX-BS02-2022 | 2022 | Baise, GX, CHN    | OR659123 |
| CHGX-MT505460-2019  | 2019 | Guangxi, CHN      | MT505460 | CHGX-BS03-2022 | 2022 | Baise, GX, CHN    | OR659124 |
| CHHLJ-MZ802955-2020 | 2020 | Heilongjiang, CHN | MZ802955 | CHGX-BS04-2022 | 2022 | Baise, GX, CHN    | OR659125 |
| CHGX-OL441343-2020  | 2020 | Guangxi, CHN      | OL441343 | CHGX-BS05-2022 | 2022 | Baise, GX, CHN    | OR659126 |
| CHTW-MZ712033-2021  | 2021 | Taiwan, CHN       | MZ712033 | CHGX-BS06-2022 | 2022 | Baise, GX, CHN    | OR659127 |
| CHTW-MZ712034-2021  | 2021 | Taiwan, CHN       | MZ712034 | CHGX-BS07-2022 | 2022 | Baise, GX, CHN    | OR659128 |
| CHTW-MZ712035-2021  | 2021 | Taiwan, CHN       | MZ712035 | CHGX-BS08-2022 | 2022 | Baise, GX, CHN    | OR659129 |
| CHTW-MZ712036-2021  | 2021 | Taiwan, CHN       | MZ712036 | CHGX-BS09-2022 | 2022 | Baise, GX, CHN    | OR659130 |
| CHTW-MZ712037-2021  | 2021 | Taiwan, CHN       | MZ712037 | CHGX-BS10-2022 | 2022 | Baise, GX, CHN    | OR659131 |
| CHTW-MZ712038-2021  | 2021 | Taiwan, CHN       | MZ712038 | CHGX-BS11-2022 | 2022 | Baise, GX, CHN    | OR659132 |
| CHTW-MZ712039-2021  | 2021 | Taiwan, CHN       | MZ712039 | CHGX-BS12-2022 | 2022 | Baise, GX, CHN    | OR659133 |
| CHTW-MZ712040-2021  | 2021 | Taiwan, CHN       | MZ712040 | CHGX-BS13-2022 | 2022 | Baise, GX, CHN    | OR659134 |
| CHTW-OM777140-2021  | 2021 | Taiwan, CHN       | OM777140 | CHGX-BS14-2022 | 2022 | Baise, GX, CHN    | OR659135 |

|                     |      |               |          |                |      |                |          |
|---------------------|------|---------------|----------|----------------|------|----------------|----------|
| CHTW-OL840383-2021  | 2021 | Taiwan,CHN    | OL840383 | CHGX-YL01-2023 | 2023 | Yulin, GX, CHN | OR659150 |
| CHSD-OM256446-2021  | 2021 | Shandong, CHN | OM256446 |                |      |                |          |
| CHGX-OQ547740-2021  | 2021 | Guangxi, CHN  | OQ547740 |                |      |                |          |
| CHGX-OQ736717-2021  | 2021 | Guangxi, CHN  | OQ736717 |                |      |                |          |
| CHZJ-OR762053-2022  | 2022 | Zhejiang,CHN  | OR762053 |                |      |                |          |
| CHJS-OQ504186-2022  | 2022 | Jiangsu,CHN   | OQ504186 |                |      |                |          |
| CHGX-OQ736716-2022  | 2022 | Guangxi, CHN  | OQ736716 |                |      |                |          |
| CHHuN-OR269935-2023 | 2023 | Hunan, CHN    | OR269935 |                |      |                |          |

---

Note: GX: Guangxi province of China; CHN: China; JPN: Japan; KOR: Korea; USA: the United States of America. The sequences obtained in this study are marked with red. The same as follows.

**Supplementary Table S2.** The information of M gene of PDCoV strains used in this study.

| Virus strain        | Date | Origin            | Accession No. | Virus strain      | Date | Origin | Accession No. |
|---------------------|------|-------------------|---------------|-------------------|------|--------|---------------|
| CHAN-KP757890-2004  | 2004 | Anhui, CHN        | KP757890      | USA-KJ584355-2014 | 2014 | USA    | KJ584355      |
| CHHK-JQ065042-2009  | 2009 | Hong Kong, CHN    | JQ065042      | USA-KJ584356-2014 | 2014 | USA    | KJ584356      |
| CHHK-JQ065043-2010  | 2010 | Hong Kong, CHN    | JQ065043      | USA-KJ584357-2014 | 2014 | USA    | KJ584357      |
| CHHK-NC039208-2010  | 2010 | Hong Kong, CHN    | NC039208      | USA-KJ584358-2014 | 2014 | USA    | KJ584358      |
| CHHuN-KY513724-2014 | 2014 | Hunan, CHN        | KY513724      | USA-KJ584359-2014 | 2014 | USA    | KJ584359      |
| CHHN-KT336560-2014  | 2014 | Henan, CHN        | KT336560      | USA-KR265847-2014 | 2014 | USA    | KR265847      |
| CHSD-MF431743-2014  | 2014 | Shandong, CHN     | MF431743      | USA-KR265848-2014 | 2014 | USA    | KR265848      |
| CHHB-KP757891-2014  | 2014 | Hubei, CHN        | KP757891      | USA-KR265849-2014 | 2014 | USA    | KR265849      |
| CHJS-KP757892-2014  | 2014 | Jiangsu, CHN      | KP757892      | USA-KR265850-2014 | 2014 | USA    | KR265850      |
| CHJS-KU665558-2014  | 2014 | Jiangsu, CHN      | KU665558      | USA-KR265851-2014 | 2014 | USA    | KR265851      |
| CHJS-KY513725-2014  | 2014 | Jiangsu, CHN      | KY513725      | USA-KR265852-2014 | 2014 | USA    | KR265852      |
| CHSD-MF431742-2015  | 2015 | Shandong, CHN     | MF431742      | USA-KR265853-2013 | 2013 | USA    | KR265853      |
| CHJX-KR131621-2015  | 2015 | Jiangxi, CHN      | KR131621      | USA-KR265854-2014 | 2014 | USA    | KR265854      |
| CHNH-KU981059-2015  | 2015 | Heilongjiang, CHN | KU981059      | USA-KR265855-2014 | 2014 | USA    | KR265855      |
| CHSD-KT021234-2015  | 2015 | Shaanxi, CHN      | KT021234      | USA-KR265856-2014 | 2014 | USA    | KR265856      |
| CHTW-MW854634-2015  | 2015 | Taiwan, CHN       | MW854634      | USA-KR265857-2014 | 2014 | USA    | KR265857      |
| CH-KX443143-2016    | 2016 | Hennan, CHN       | KX443143      | USA-KR265858-2014 | 2014 | USA    | KR265858      |
| CHGD-KY363868-2016  | 2016 | Guangdong, CHN    | KY363868      | USA-KR265859-2014 | 2014 | USA    | KR265859      |
| CHGS-MF642322-2016  | 2016 | Gansu, CHN        | MF642322      | USA-KR265860-2014 | 2014 | USA    | KR265860      |
| CHGS-MF642323-2016  | 2016 | Gansu, CHN        | MF642323      | USA-KR265861-2014 | 2014 | USA    | KR265861      |
| CHSC-MK355396-2016  | 2016 | Sichuan, CHN      | MK355396      | USA-KR265862-2014 | 2014 | USA    | KR265862      |
| CHHB-KY129985-2016  | 2016 | Hubei, CHN        | KY129985      | USA-KR265863-2014 | 2014 | USA    | KR265863      |
| CHJX-KY293677-2016  | 2016 | Jiangxi, CHN      | KY293677      | USA-KR265864-2014 | 2014 | USA    | KR265864      |
| CHJX-KY293678-2016  | 2016 | Jiangxi, CHN      | KY293678      | USA-KR265865-2014 | 2014 | USA    | KR265865      |
| CHGD-KY363867-2016  | 2016 | Guangdong, CHN    | KY363867      | USA-KT381613-2014 | 2014 | USA    | KT381613      |

|                     |      |                |          |                   |      |     |          |
|---------------------|------|----------------|----------|-------------------|------|-----|----------|
| CHGD-MH715491-2016  | 2016 | Guangdong, CHN | MH715491 | USA-KJ567050-2014 | 2014 | USA | KJ567050 |
| CHGD-MF280390-2016  | 2016 | Guangdong, CHN | MF280390 | USA-KJ481931-2014 | 2014 | USA | KJ481931 |
| CHTJ-KY065120-2016  | 2016 | Tianjin, CHN   | KY065120 | USA-KJ620016-2014 | 2014 | USA | KJ620016 |
| CHCQ-MZ772936-2016  | 2016 | Chongqing, CHN | MZ772936 | USA-KJ462462-2014 | 2014 | USA | KJ462462 |
| CHSH-MF041982-2016  | 2016 | Shanghai, CHN  | MF041982 | USA-KJ569769-2014 | 2014 | USA | KJ569769 |
| CHGX-MZ388469-2016  | 2016 | Guangxi, CHN   | MZ388469 | USA-KM012168-2014 | 2014 | USA | KM012168 |
| CHGS-MF642324-2017  | 2017 | Gansu, CHN     | MF642324 | USA-MZ291567-2014 | 2014 | USA | MZ291567 |
| CHGS-MF642325-2017  | 2017 | Gansu, CHN     | MF642325 | USA-KX022602-2015 | 2015 | USA | KX022602 |
| CHSC-MK330604-2017  | 2017 | Sichuan, CHN   | MK330604 | USA-KX022604-2015 | 2015 | USA | KX022604 |
| CHSC-MK572803-2017  | 2017 | Sichuan, CHN   | MK572803 | USA-KX022603-2015 | 2015 | USA | KX022603 |
| CHSC-MK211169-2017  | 2017 | Sichuan, CHN   | MK211169 | USA-KX022605-2015 | 2015 | USA | KX022605 |
| CHHeB-MG242062-2017 | 2017 | Hebei, CHN     | MG242062 | USA-KR150443-2015 | 2015 | USA | KR150443 |
| CHHB-MF948005-2017  | 2017 | Hubei, CHN     | MF948005 | JPN-LC260038-2014 | 2014 | JPN | LC260038 |
| CHHG-MF572803-2017  | 2017 | Hunan, CHN     | MF572803 | JPN-LC260039-2014 | 2014 | JPN | LC260039 |
| CHJS-MN249445-2017  | 2017 | Jiangsu, CHN   | MN249445 | JPN-LC260040-2014 | 2014 | JPN | LC260040 |
| CHGX-MZ388470-2017  | 2017 | Guangxi, CHN   | MZ388470 | JPN-LC260041-2014 | 2014 | JPN | LC260041 |
| CHGX-MZ388471-2017  | 2017 | Guangxi, CHN   | MZ388471 | JPN-LC260042-2014 | 2014 | JPN | LC260042 |
| CHGX-MZ388472-2017  | 2017 | Guangxi, CHN   | MZ388472 | JPN-LC260043-2014 | 2014 | JPN | LC260043 |
| CHGX-MT524746-2017  | 2017 | Guangxi, CHN   | MT524746 | JPN-LC260044-2014 | 2014 | JPN | LC260044 |
| CHGX-MT524747-2017  | 2017 | Guangxi, CHN   | MT524747 | JPN-LC260045-2016 | 2016 | JPN | LC260045 |
| CHGX-MT524748-2017  | 2017 | Guangxi, CHN   | MT524748 | KOR-KM820765-2014 | 2014 | KOR | KM820765 |
| CHGX-MT524749-2017  | 2017 | Guangxi, CHN   | MT524749 | KOR-KY364365-2014 | 2014 | KOR | KY364365 |
| CHGX-MT524750-2017  | 2017 | Guangxi, CHN   | MT524750 | KOR-KY926512-2016 | 2016 | KOR | KY926512 |
| CHGX-MN025260-2017  | 2017 | Guangxi, CHN   | MN025260 | KOR-KY354363-2016 | 2016 | KOR | KY354363 |
| CHSC-MK005882-2018  | 2018 | Sichuan, CHN   | MK005882 | KOR-KY354364-2016 | 2016 | KOR | KY354364 |
| CHSC-MK330605-2018  | 2018 | Sichuan, CHN   | MK330605 | KOR-MG837130-2016 | 2016 | KOR | MG837130 |
| CHHN-MH708123-2018  | 2018 | Henan, CHN     | MH708123 | KOR-MG837131-2016 | 2016 | KOR | MG837131 |

|                    |      |               |          |                        |      |                   |          |
|--------------------|------|---------------|----------|------------------------|------|-------------------|----------|
| CHHN-MH708124-2018 | 2018 | Henan, CHN    | MH708124 | KOR-MG837132-2016      | 2016 | KOR               | MG837132 |
| CHHN-MH708125-2018 | 2018 | Henan, CHN    | MH708125 | KOR-MG837133-2016      | 2016 | KOR               | MG837133 |
| CHJX-MK625638-2018 | 2018 | Jiangxi, CHN  | MK625638 | Thailand-KX613443-2013 | 2013 | Thailand          | KX613443 |
| CHJX-MK625639-2018 | 2018 | Jiangxi, CHN  | MK625639 | Thailand-KX361344-2013 | 2013 | Thailand          | KX361344 |
| CHJX-MK625640-2018 | 2018 | Jiangxi, CHN  | MK625640 | Thailand-KU984334-2015 | 2015 | Thailand          | KU984334 |
| CHJX-MK625641-2018 | 2018 | Jiangxi, CHN  | MK625641 | Thailand-KX361345-2015 | 2015 | Thailand          | KX361345 |
| CHGX-MZ388473-2018 | 2018 | Guangxi, CHN  | MZ388473 | Thailand-KU051641-2015 | 2015 | Thailand          | KU051641 |
| CHGX-MZ388474-2018 | 2018 | Guangxi, CHN  | MZ388474 | Thailand-KU051649-2015 | 2015 | Thailand          | KU051649 |
| CHGX-MK359104-2018 | 2018 | Guangxi, CHN  | MK359104 | Thailand-MZ802772-2016 | 2016 | Thailand          | MZ802772 |
| CHGX-MN173782-2018 | 2018 | Guangxi, CHN  | MN173782 | Thailand-MZ802773-2016 | 2016 | Thailand          | MZ802773 |
| CHGX-MN173779-2018 | 2018 | Guangxi, CHN  | MN173779 | Thailand-MZ802774-2016 | 2016 | Thailand          | MZ802774 |
| CHGX-MN173780-2018 | 2018 | Guangxi, CHN  | MN173780 | Thailand-MZ802775-2016 | 2016 | Thailand          | MZ802775 |
| CHGX-MN173781-2018 | 2018 | Guangxi, CHN  | MN173781 | Thailand-MZ802777-2016 | 2016 | Thailand          | MZ802777 |
| CHGX-MT524751-2018 | 2018 | Guangxi, CHN  | MT524751 | Vietnam-MH118332-2015  | 2015 | Vietnam           | MH118332 |
| CHGX-MT524752-2018 | 2018 | Guangxi, CHN  | MT524752 | Vietnam-MZ802776-2016  | 2016 | Vietnam           | MZ802776 |
| CHGX-MT524753-2018 | 2018 | Guangxi, CHN  | MT524753 | GXBS01-2020            | 2020 | Baise, GX, CHN    | OR659151 |
| CHGX-MT524754-2018 | 2018 | Guangxi, CHN  | MT524754 | GXBS02-2020            | 2020 | Baise, GX, CHN    | OR659152 |
| CHGX-MT524755-2018 | 2018 | Guangxi, CHN  | MT524755 | GXBS03-2020            | 2020 | Baise, GX, CHN    | OR659153 |
| CHGX-MT524756-2018 | 2018 | Guangxi, CHN  | MT524756 | GXBS01-2021            | 2021 | Baise, GX, CHN    | OR659154 |
| CHGX-MN520203-2018 | 2018 | Guangxi, CHN  | MN520203 | GXBS02-2021            | 2021 | Baise, GX, CHN    | OR659155 |
| CHGX-MN058073-2018 | 2018 | Guangxi, CHN  | MN058073 | GXCZ01-2021            | 2021 | Chongzuo, GX, CHN | OR659170 |
| CHTS-MT665769-2019 | 2019 | Hebei, CHN    | MT665769 | GXCZ02-2021            | 2021 | Chongzuo, GX, CHN | OR659171 |
| CHSC-MK993519-2019 | 2019 | Sichuan, CHN  | MK993519 | GXCZ03-2021            | 2021 | Chongzuo, GX, CHN | OR659172 |
| CHSD-MN520191-2019 | 2019 | Shandong, CHN | MN520191 | GXCZ04-2021            | 2021 | Chongzuo, GX, CHN | OR659173 |
| CHGX-MT524757-2019 | 2019 | Guangxi, CHN  | MT524757 | GXNN01-2021            | 2021 | Nanning, GX, CHN  | OR659181 |
| CHGX-MT524758-2019 | 2019 | Guangxi, CHN  | MT524758 | GXNN02-2021            | 2021 | Nanning, GX, CHN  | OR659182 |
| CHGX-MT524759-2019 | 2019 | Guangxi, CHN  | MT524759 | GXNN03-2021            | 2021 | Nanning, GX, CHN  | OR659183 |



|                     |      |                   |          |             |      |                  |          |
|---------------------|------|-------------------|----------|-------------|------|------------------|----------|
| CHGX-MT524762-2019  | 2019 | Guangxi, CHN      | MT524762 | GXBS01-2022 | 2022 | Baise, GX, CHN   | OR659156 |
| CHGX-MT524761-2019  | 2019 | Guangxi, CHN      | MT524761 | GXBS02-2022 | 2022 | Baise, GX, CHN   | OR659157 |
| CHAH-MN520198-2019  | 2019 | Anhui, CHN        | MN520198 | GXBS03-2022 | 2022 | Baise, GX, CHN   | OR659158 |
| CHHLJ-MZ802955-2020 | 2020 | Heilongjiang, CHN | MZ802955 | GXBS04-2022 | 2022 | Baise, GX, CHN   | OR659159 |
| CHSD-OM256446-2021  | 2021 | Shandong, CHN     | OM256446 | GXBS05-2022 | 2022 | Baise, GX, CHN   | OR659160 |
| CHGX-OQ547740-2021  | 2021 | Guangxi, CHN      | OQ547740 | GXBS06-2022 | 2022 | Baise, GX, CHN   | OR659161 |
| CHGX-OQ736717-2021  | 2021 | Guangxi, CHN      | OQ736717 | GXBS07-2022 | 2022 | Baise, GX, CHN   | OR659162 |
| CHGX-OQ736716-2022  | 2022 | Guangxi, CHN      | OQ736716 | GXBS08-2022 | 2022 | Baise, GX, CHN   | OR659163 |
| CHHuN-OR269935-2023 | 2023 | Hunan, CHN        | OR269935 | GXBS09-2022 | 2022 | Baise, GX, CHN   | OR659164 |
| Lao-KX118527-2016   | 2016 | Lao               | KX118527 | GXBS10-2022 | 2022 | Baise, GX, CHN   | OR659165 |
|                     |      |                   |          | GXBS11-2022 | 2022 | Baise, GX, CHN   | OR659166 |
|                     |      |                   |          | GXBS12-2022 | 2022 | Baise, GX, CHN   | OR659167 |
|                     |      |                   |          | GXBS13-2022 | 2022 | Baise, GX, CHN   | OR659168 |
|                     |      |                   |          | GXBS14-2022 | 2022 | Baise, GX, CHN   | OR659169 |
|                     |      |                   |          | GXGG01-2022 | 2022 | Guigang, GX, CHN | OR659174 |
|                     |      |                   |          | GXGG02-2022 | 2022 | Guigang, GX, CHN | OR659175 |
|                     |      |                   |          | GXGG03-2022 | 2022 | Guigang, GX, CHN | OR659176 |
|                     |      |                   |          | GXGG04-2022 | 2022 | Guigang, GX, CHN | OR659177 |
|                     |      |                   |          | GXGG05-2022 | 2022 | Guigang, GX, CHN | OR659178 |
|                     |      |                   |          | GXGG06-2022 | 2022 | Guigang, GX, CHN | OR659179 |
|                     |      |                   |          | GXGG07-2022 | 2022 | Guigang, GX, CHN | OR659180 |
|                     |      |                   |          | GXYL01-2023 | 2023 | Yulin, GX, CHN   | OR659184 |

**Supplementary Table S3.** The information of N gene of PDCoV strains in this study.

| Virus strain | Date | Origin | Accession No. | Virus strain | Date | Origin | Accession No. |
|--------------|------|--------|---------------|--------------|------|--------|---------------|
|--------------|------|--------|---------------|--------------|------|--------|---------------|

|                         |      |                   |          |                   |      |     |          |
|-------------------------|------|-------------------|----------|-------------------|------|-----|----------|
| CHAH-KP757890-2004      | 2004 | Anhui, CHN        | KP757890 | USA-KR265847-2014 | 2014 | USA | KR265847 |
| CHHK-JQ065042-2009      | 2009 | Hong Kong, CHN    | JQ065042 | USA-KR265848-2014 | 2014 | USA | KR265848 |
| CHHK-JQ065043-2010      | 2010 | Hong Kong, CHN    | JQ065043 | USA-KR265849-2014 | 2014 | USA | KR265849 |
| CHHK-NC039208-2010      | 2010 | Hong Kong, CHN    | NC039208 | USA-KR265850-2014 | 2014 | USA | KR265850 |
| CHSD-MF431743-2014      | 2014 | Shandong, CHN     | MF431743 | USA-KR265851-2014 | 2014 | USA | KR265851 |
| CHHB-KP757891-2014      | 2014 | Hebei, CHN        | KP757891 | USA-KR265852-2014 | 2014 | USA | KR265852 |
| CHHN-KT336560-2014      | 2014 | Hennan, CHN       | KT336560 | USA-KR265853-2014 | 2014 | USA | KR265853 |
| CHJS-KU665558-2014      | 2014 | Jiangsu, CHN      | KU665558 | USA-KR265854-2014 | 2014 | USA | KR265854 |
| CHHuN-KY513724-2014     | 2014 | Hunan, CHN        | KY513724 | USA-KR265855-2014 | 2014 | USA | KR265855 |
| CHSD-MF431742-2015      | 2015 | Shandong, CHN     | MF431742 | USA-KR265856-2014 | 2014 | USA | KR265856 |
| CHHeN-MN942260-2015     | 2015 | Henan, CHN        | MN942260 | USA-KR265857-2014 | 2014 | USA | KR265857 |
| CHJX-KR131621-2015      | 2015 | Jiangxi, CHN      | KR131621 | USA-KR265858-2014 | 2014 | USA | KR265858 |
| CHNH-KU981059-2015      | 2015 | Heilongjiang, CHN | KU981059 | USA-KR265859-2014 | 2014 | USA | KR265859 |
| CHShaanxi-KT021234-2015 | 2015 | Shaanxi, CHN      | KT021234 | USA-KR265860-2014 | 2014 | USA | KR265860 |
| CHTW-MW854634-2015      | 2015 | Taiwan, CHN       | MW854634 | USA-KR265861-2014 | 2014 | USA | KR265861 |
| CHGX-KU204697-2015      | 2015 | Guangxi, CHN      | KU204697 | USA-KR265862-2014 | 2014 | USA | KR265862 |
| CHGS-MF642322-2016      | 2016 | Gansu, CHN        | MF642322 | USA-KR265863-2014 | 2014 | USA | KR265863 |
| CHGS-MF642323-2016      | 2016 | Gansu, CHN        | MF642323 | USA-KR265864-2014 | 2014 | USA | KR265864 |
| CHSC-MK355396-2016      | 2016 | Sichuan, CHN      | MK355396 | USA-KR265865-2014 | 2014 | USA | KR265865 |
| CHHB-KY129986-2016      | 2016 | Hubei, CHN        | KY129986 | USA-KJ567050-2014 | 2014 | USA | KJ567050 |
| CH-KX443143-2016        | 2016 | Henan, CHN        | KX443143 | USA-KJ569769-2014 | 2014 | USA | KJ569769 |
| CHHN-MG832584-2016      | 2016 | Henan, CHN        | MG832584 | USA-KJ584355-2014 | 2014 | USA | KJ584355 |
| CHGD-KY363867-2016      | 2016 | Guangdong, CHN    | KY363867 | USA-KJ584356-2014 | 2014 | USA | KJ584356 |
| CHGD-KY363868-2016      | 2016 | Guangdong, CHN    | KY363868 | USA-KJ584357-2014 | 2014 | USA | KJ584357 |
| CHGD-MF280390-2016      | 2016 | Guangdong, CHN    | MF280390 | USA-KJ584358-2014 | 2014 | USA | KJ584358 |
| CHGD-MH715491-2016      | 2016 | Guangdong, CHN    | MH715491 | USA-KJ584359-2014 | 2014 | USA | KJ584359 |
| CHJX-KY293677-2016      | 2016 | Jiangxi, CHN      | KY293677 | USA-MZ291567-2014 | 2014 | USA | MZ291567 |

|                     |      |                |          |                        |      |          |          |
|---------------------|------|----------------|----------|------------------------|------|----------|----------|
| CHJX-KY293678-2016  | 2016 | Jiangxi, CHN   | KY293678 | USA-KJ481931-2014      | 2014 | USA      | KJ481931 |
| CHJS-KY513725-2016  | 2016 | Jiangsu, CHN   | KY513725 | USA-KJ620016-2014      | 2014 | USA      | KJ620016 |
| GHSB-MF041982-2016  | 2016 | Shanghai, CHN  | MF041982 | USA-KT381613-2014      | 2014 | USA      | KT381613 |
| CHCQ-MZ772936-2016  | 2016 | Chongqing, CHN | MZ772936 | USA-KM012168-2014      | 2014 | USA      | KM012168 |
| CHTJ-KY065120-2016  | 2016 | Tianjin, CHN   | KY065120 | USA-KX022602-2015      | 2015 | USA      | KX022602 |
| CHGX-MZ388469-2016  | 2016 | Guangxi, CHN   | MZ388469 | USA-KX022603-2015      | 2015 | USA      | KX022603 |
| CHGS-MF682324-2017  | 2017 | Gansu, CHN     | MF682324 | USA-KX022604-2015      | 2015 | USA      | KX022604 |
| CHGS-MF642325-2017  | 2017 | Gansu, CHN     | MF642325 | USA-KX022605-2015      | 2015 | USA      | KX022605 |
| CHSC-MK572803-2017  | 2017 | Sichuan, CHN   | MK572803 | USA-KR150443-2015      | 2015 | USA      | KR150443 |
| CHSC-MK330604-2017  | 2017 | Sichuan, CHN   | MK330604 | JPN-LC260038-2014      | 2014 | JPN      | LC260038 |
| CHSC-MK211169-2017  | 2017 | Sichuan, CHN   | MK211169 | JPN-LC260039-2014      | 2014 | JPN      | LC260039 |
| CHHB-MF948005-2017  | 2017 | Hubei, CHN     | MF948005 | JPN-LC260040-2014      | 2014 | JPN      | LC260040 |
| CHHeB-MG242062-2017 | 2017 | Hebei, CHN     | MG242062 | JPN-LC260041-2014      | 2014 | JPN      | LC260041 |
| CHJS-MN249445-2017  | 2017 | Jiangsu, CHN   | MN249445 | JPN-LC260042-2014      | 2014 | JPN      | LC260042 |
| CHHG-MF095123-2017  | 2017 | Hubei, CHN     | MF095123 | JPN-LC260043-2014      | 2014 | JPN      | LC260043 |
| CHGX-MZ388470-2017  | 2017 | Guangxi, CHN   | MZ388470 | JPN-LC260044-2014      | 2014 | JPN      | LC260044 |
| CHGX-MZ388471-2017  | 2017 | Guangxi, CHN   | MZ388471 | JPN-LC260045-2016      | 2016 | JPN      | LC260045 |
| CHGX-MZ388472-2017  | 2017 | Guangxi, CHN   | MZ388472 | KOR-KM820765-2014      | 2014 | KOR      | KM820765 |
| CHGX-MT524762-2017  | 2017 | Guangxi, CHN   | MT524762 | KOR-KY354363-2016      | 2016 | KOR      | KY354363 |
| CHGX-MT524763-2017  | 2017 | Guangxi, CHN   | MT524763 | KOR-KY354364-2016      | 2016 | KOR      | KY354364 |
| CHGX-MT524764-2017  | 2017 | Guangxi, CHN   | MT524764 | KOR-KY354365-2014      | 2014 | KOR      | KY354365 |
| CHGX-MT524765-2017  | 2017 | Guangxi, CHN   | MT524765 | KOR-MG837130-2016      | 2016 | KOR      | MG837130 |
| CHGX-MT524766-2017  | 2017 | Guangxi, CHN   | MT524766 | KOR-MG837131-2016      | 2016 | KOR      | MG837131 |
| CHGX-MN025260-2017  | 2017 | Guangxi, CHN   | MN025260 | KOR-MG837132-2016      | 2016 | KOR      | MG837132 |
| CHSC-MK330605-2018  | 2018 | Sichuan, CHN   | MK330605 | KOR-MG837133-2016      | 2016 | KOR      | MG837133 |
| CHSC-MK005882-2018  | 2018 | Sichuan, CHN   | MK005882 | KOR-KY926512-2016      | 2016 | KOR      | KY926512 |
| CHSC-KT266822-2018  | 2018 | Sichuan, CHN   | KT266822 | Thailand-KX361343-2013 | 2013 | Thailand | KX361343 |

|                    |      |               |          |                        |      |                |          |
|--------------------|------|---------------|----------|------------------------|------|----------------|----------|
| CHHN-MH708123-2018 | 2018 | Henan, CHN    | MH708123 | Thailand-KX361344-2013 | 2013 | Thailand       | KX361344 |
| CHHN-MH708124-2018 | 2018 | Henan, CHN    | MH708124 | Thailand-KU984334-2015 | 2015 | Thailand       | KU984334 |
| CHHN-MH708125-2018 | 2018 | Henan, CHN    | MH708125 | Thailand-KU051641-2015 | 2015 | Thailand       | KU051641 |
| CHJX-KY625638-2018 | 2018 | Jiangxi, CHN  | KY625638 | Thailand-KX361345-2015 | 2015 | Thailand       | KX361345 |
| CHJX-KY625639-2018 | 2018 | Jiangxi, CHN  | KY625639 | Thailand-KU051649-2015 | 2015 | Thailand       | KU051649 |
| CHJX-KY625640-2018 | 2018 | Jiangxi, CHN  | KY625640 | Thailand-MZ802772-2016 | 2016 | Thailand       | MZ802772 |
| CHJX-MK625641-2018 | 2018 | Jiangxi, CHN  | MK625641 | Thailand-MZ802773-2016 | 2016 | Thailand       | MZ802773 |
| CHGX-MZ388473-2018 | 2018 | Guangxi, CHN  | MZ388473 | Thailand-MZ802774-2016 | 2016 | Thailand       | MZ802774 |
| CHGX-MZ388474-2018 | 2018 | Guangxi, CHN  | MZ388474 | Thailand-MZ802775-2016 | 2016 | Thailand       | MZ802775 |
| CHGX-MK359104-2018 | 2018 | Guangxi, CHN  | MK359104 | Thailand-MZ802777-2016 | 2016 | Thailand       | MZ802777 |
| CHGX-MN173782-2018 | 2018 | Guangxi, CHN  | MN173782 | Vietnam-KX834351-2015  | 2015 | Vietnam        | KX834351 |
| CHGX-MN173779-2018 | 2018 | Guangxi, CHN  | MN173779 | Vietnam-KX834352-2015  | 2015 | Vietnam        | KX834352 |
| CHGX-MN173780-2018 | 2018 | Guangxi, CHN  | MN173780 | Vietnam-MH700628-2015  | 2015 | Vietnam        | MH700628 |
| CHGX-MN173781-2018 | 2018 | Guangxi, CHN  | MN173781 | Vietnam-MH118332-2015  | 2015 | Vietnam        | MH118332 |
| CHGX-MT648377-2018 | 2018 | Guangxi, CHN  | MT648377 | Vietnam-MZ802776-2016  | 2016 | Vietnam        | MZ802776 |
| CHGX-MT648378-2018 | 2018 | Guangxi, CHN  | MT648378 | Lao-KX118627-2016      | 2016 | Lao            | KX118627 |
| CHGX-MT648379-2018 | 2018 | Guangxi, CHN  | MT648379 | GXBS01-2020            | 2020 | Baise, GX, CHN | OR659185 |
| CHGX-MT648380-2018 | 2018 | Guangxi, CHN  | MT648380 | GXBS02-2020            | 2020 | Baise, GX, CHN | OR659186 |
| CHGX-MT648381-2018 | 2018 | Guangxi, CHN  | MT648381 | GXBS03-2020            | 2020 | Baise, GX, CHN | OR659187 |
| CHGX-MT648382-2018 | 2018 | Guangxi, CHN  | MT648382 | GXBS01-2021            | 2021 | Baise, GX, CHN | OR659188 |
| CHGX-MN520203-2018 | 2018 | Guangxi, CHN  | MN520203 | GXBS02-2021            | 2021 | Baise, GX, CHN | OR659189 |
| CHGX-MN058073-2018 | 2018 | Guangxi, CHN  | MN058073 | GXBS01-2022            | 2022 | Baise, GX, CHN | OR659190 |
| CHSC-MK993519-2019 | 2019 | Sichuan, CHN  | MK993519 | GXBS02-2022            | 2022 | Baise, GX, CHN | OR659191 |
| CHSD-MN520191-2019 | 2019 | Shandong, CHN | MN520191 | GXBS03-2022            | 2022 | Baise, GX, CHN | OR659192 |
| CHTJ-MT663769-2019 | 2019 | Tianjin, CHN  | MT663769 | GXBS04-2022            | 2022 | Baise, GX, CHN | OR659193 |
| CHGX-MT648383-2019 | 2019 | Guangxi, CHN  | MT648383 | GXBS05-2022            | 2022 | Baise, GX, CHN | OR659194 |
| CHGX-MT648384-2019 | 2019 | Guangxi, CHN  | MT648384 | GXBS06-2022            | 2022 | Baise, GX, CHN | OR659195 |

|                     |      |                   |          |             |      |                   |          |
|---------------------|------|-------------------|----------|-------------|------|-------------------|----------|
| CHGX-MT648385-2019  | 2019 | Guangxi, CHN      | MT648385 | GXBS07-2022 | 2022 | Baise, GX, CHN    | OR659196 |
| CHGX-MT648386-2019  | 2019 | Guangxi, CHN      | MT648386 | GXBS08-2022 | 2022 | Baise, GX, CHN    | OR659197 |
| CHGX-MT648387-2019  | 2019 | Guangxi, CHN      | MT648387 | GXBS09-2022 | 2022 | Baise, GX, CHN    | OR659198 |
| CHHLJ-MZ802955-2020 | 2020 | Heilongjiang, CHN | MZ802955 | GXBS10-2022 | 2022 | Baise, GX, CHN    | OR659199 |
| CHSD-OM256446-2021  | 2021 | Shandong, CHN     | OM256446 | GXBS11-2022 | 2022 | Baise, GX, CHN    | OR659200 |
| CHGX-OQ547740-2021  | 2021 | Guangxi, CHN      | OQ547740 | GXBS12-2022 | 2022 | Baise, GX, CHN    | OR659201 |
| CHGX-OQ736717-2021  | 2021 | Guangxi, CHN      | OQ736717 | GXBS13-2022 | 2022 | Baise, GX, CHN    | OR659202 |
| CHGX-OQ736716-2022  | 2022 | Guangxi, CHN      | OQ736716 | GXBS14-2022 | 2022 | Baise, GX, CHN    | OR659203 |
| CHHuN-OR269935-2023 | 2023 | Hunan, CHN        | OR269935 | GXCZ01-2021 | 2021 | Chongzuo, GX, CHN | OR659204 |
|                     |      |                   |          | GXCZ02-2021 | 2021 | Chongzuo, GX, CHN | OR659205 |
|                     |      |                   |          | GXCZ03-2021 | 2021 | Chongzuo, GX, CHN | OR659206 |
|                     |      |                   |          | GXCZ04-2021 | 2021 | Chongzuo, GX, CHN | OR659207 |
|                     |      |                   |          | GXGG01-2022 | 2022 | Guigang, GX, CHN  | OR659208 |
|                     |      |                   |          | GXGG02-2022 | 2022 | Guigang, GX, CHN  | OR659209 |
|                     |      |                   |          | GXGG03-2022 | 2022 | Guigang, GX, CHN  | OR659210 |
|                     |      |                   |          | GXGG04-2022 | 2022 | Guigang, GX, CHN  | OR659211 |
|                     |      |                   |          | GXGG05-2022 | 2022 | Guigang, GX, CHN  | OR659212 |
|                     |      |                   |          | GXGG06-2022 | 2022 | Guigang, GX, CHN  | OR659213 |
|                     |      |                   |          | GXGG07-2022 | 2022 | Guigang, GX, CHN  | OR659214 |
|                     |      |                   |          | GXNN01-2021 | 2021 | Nanning, GX, CHN  | OR659215 |
|                     |      |                   |          | GXNN02-2021 | 2021 | Nanning, GX, CHN  | OR659216 |
|                     |      |                   |          | GXNN03-2021 | 2021 | Nanning, GX, CHN  | OR659217 |
|                     |      |                   |          | GXYL01-2023 | 2023 | Yulin, GX, CHN    | OR659218 |

---
